# Supplementary material
Source: publisher figshare collection journal article supplement (https://sage.figshare.com/ndownloader/files/20045723)
Supplement: Supplementary file 1 [file 20045723]

## **Online appendix**

**Does politics drive conflict in central banks' committees?**

**Lifting the veil on the ECB consensus**

Manuela Moschella, Department of Political and Social Sciences, Scuola Normale Superiore,  
Florence, Italy

Nicola Martocchia Diodati, Department of Political and Social Sciences, Scuola Normale  
Superiore, Florence, Italy

**Annex 1: Validation of topic model results and topics' interpretation**

**Figure 1**  
**Deveaud Score for different LDA models**

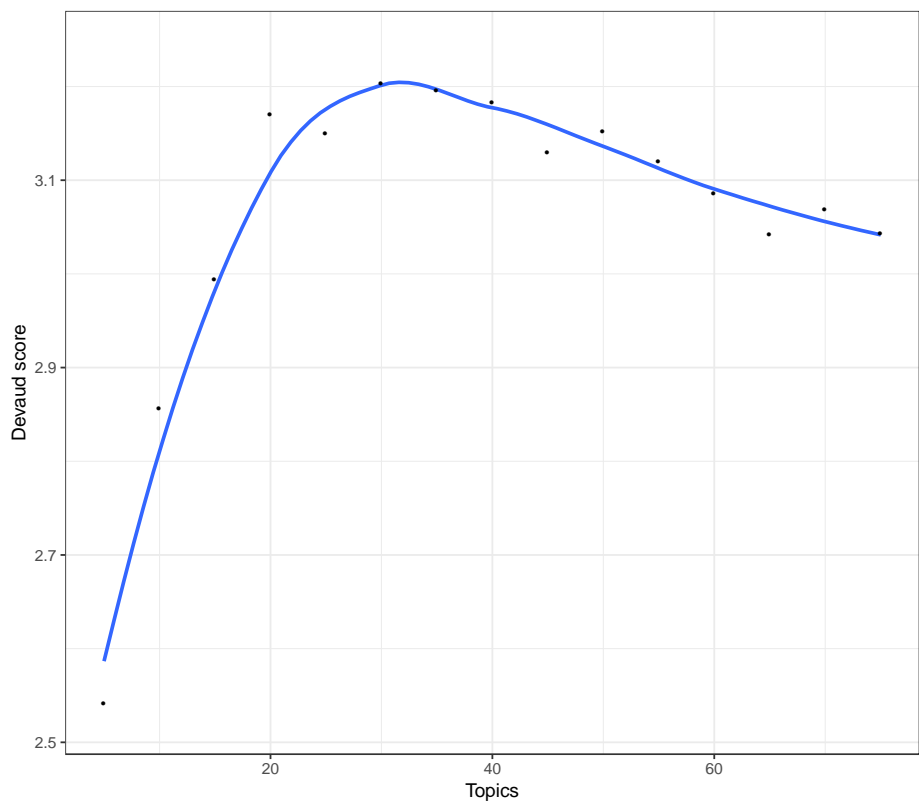

**Table 1**  
**Topics in central bankers' communication and most representative words\***

| Domains                     | Category                          | Topic label                                                | Representative words                                                                                                                                                                                                                                              |
|-----------------------------|-----------------------------------|------------------------------------------------------------|-------------------------------------------------------------------------------------------------------------------------------------------------------------------------------------------------------------------------------------------------------------------|
| Monetary Policy             | Mandate                           | <i>Eurosystem mandate</i>                                  | polici, monetari, stabil, central, price, object, maintain, independ, credibl, achiev, mandat, clear, eurosystem, respons, ecb, contribut, decis, term, primari, strategi, ensur, medium, econom, stanc, conduct, policymak, framework, stabl, transmiss, success |
|                             | Policy Tools                      | <i>Interest rate policy</i>                                | rate, inflat, price, interest, low, expect, level, lower, effect, term, target, increas, real, higher, rise, period, pressur, longterm, oil, averag, point, consum, nomin, wage, past, fall, high, persist, volatil, shortterm                                    |
|                             | Operational Framework             | <i>Inflation forecasts</i>                                 | price, growth, remain, econom, continu, area, develop, expect, euro, medium, risk, annual, rate, monetari, outlook, term, increas, inflat, recent, quarter, stabil, support, project, assess, confirm, moder, analysi, pressur, line, activ                       |
| Liquidity Assistance        | Standard Liquidity Operations     | <i>Liquidity provision</i>                                 | bank, market, liquid, oper, central, measur, money, rate, eurosystem, provid, time, interest, refinanc, ecb, proof, first, matur, collater, confid, period, function, action, sinc, reserv, condit, normal, main, fund, facil, support                            |
|                             | Non-standard Liquidity Operations | <i>Balance sheet and non-standard liquidity operations</i> | invest, loan, credit, asset, sector, financ, household, purchas, condit, firm, balanc, privat, speech, corpor, improv, lend, measur, banker, support, recoveri, programm, busi, sheet, real, reduc, economi, bis, adjust, remain, effect                          |
| Financial Market Regulation | Microprudential Regulation        | <i>Bank capital requirements</i>                           | risk, basel, framework, committe, standard, supervisor, manag, capit, bank, requir, work, regulatori, implement, supervisor, approach, regul, practic, intern, rule, account, review, supervis, measur, principl, consist, assess, improv, need, industri, promot |

|                                   |                                    |                                        |                                                                                                                                                                                                                                                                         |
|-----------------------------------|------------------------------------|----------------------------------------|-------------------------------------------------------------------------------------------------------------------------------------------------------------------------------------------------------------------------------------------------------------------------|
|                                   | Microprudential Regulation         | <i>Bank capital requirements</i>       | risk, basel, framework, committe, standard, supervisor, manag, capit, bank, requir, work, regulatori, implement, supervisor, approach, regul, practic, intern, rule, account, review, supervis, measur, principl, consist, assess, improv, need, industri, promot       |
|                                   | Microprudential Regulation         | <i>Bank supervision</i>                | bank, institut, author, central, nation, supervisor, manag, respons, supervis, law, group, involv, task, control, public, function, legal, legisl, itali, ensur, board, oper, system, cooper, action, includ, direct, rule, establish, plan                             |
|                                   | Macroprudential Regulation         | <i>Macroprudential regulation</i>      | financi, system, crisi, institut, stabil, regul, global, sector, need, macroprudenti, import, intern, supervis, author, level, respons, role, challeng, resili, lesson, address, risk, coordin, crise, play, regulatori, prevent, key, nation, framework                |
|                                   | Macroprudential Regulation         | <i>Systemic risks</i>                  | risk, financi, market, credit, asset, manag, increas, fund, investor, liquid, •, excess, innov, particip, instrument, deriv, institut, complex, system, volatil, consequ, financ, behaviour, high, structur, review, bubbl, result, incent, product                     |
|                                   | Macroprudential Regulation         | <i>Financial market infrastructure</i> | market, financi, integr, european, secur, system, effici, payment, bond, crossbord, servic, process, develop, singl, infrastructur, increas, settlement, initi, benefit, contribut, transact, activ, provid, particip, sector, direct, equiti, import, competit, foster |
| Member Countries' Economic Policy | Government Finances                | <i>Fiscal policy</i>                   | reform, fiscal, structur, growth, need, public, sustain, econom, implement, govern, polici, countri, consolid, deficit, financ, adjust, pact, ensur, confid, sound, budget, necessari, support, macroeconom, order, improv, strengthen, progress, effort, budgetari     |
|                                   | Government Finances                | <i>Sovereign debt</i>                  | crisi, debt, countri, sovereign, govern, speech, banker, greec, fiscal, bis, bond, public, greek, problem, howev, financ, central, market, risk, programm, prevent, rule, germani, euroarea, liabil, privat, caus, consequ, current, sever                              |
|                                   | Structural Reforms                 | <i>Structural reforms</i>              | product, labour, growth, competit, increas, market, employ, cost, unemploy, reform, social, wage, sector, invest, age, job, high, pension, higher, economi, educ, benefit, improv, popul, work, flexibl, technolog, structur, servic, level                             |
|                                   | Assessment Macroeconomic Situation | <i>Growth outlook</i>                  | economi, spanish, spain, situat, recent, continu, signific, proof, banco, particular, posit, extern, level, result, correct, chang, effect, set, face, year,                                                                                                            |

|                              |                                    |                                                  |                                                                                                                                                                                                                                            |
|------------------------------|------------------------------------|--------------------------------------------------|--------------------------------------------------------------------------------------------------------------------------------------------------------------------------------------------------------------------------------------------|
|                              |                                    |                                                  | activ, adjust, factor, process, increas, certain, high, made, adopt, main                                                                                                                                                                  |
|                              | Assessment Macroeconomic Situation | <i>Growth outlook</i>                            | growth, economi, year, demand, econom, domest, continu, recoveri, weak, strong, recent, prospect, last, past, output, fall, overal, extern, sector, busi, now, uncertainti, sustain, sinc, remain, slow, unemploy, whole, quarter, confid  |
|                              | Regulatory Interventions           | <i>Housing Financing</i>                         | servic, proof, central, insur, firm, busi, provid, protect, payment, custom, consum, bank, ireland, financ, need, includ, mortgag, lender, irish, relat, borrow, innov, case, import, work, speech, issu, compani, technolog, make         |
| European Integration Process | Single Currency Adoption           | <i>Euro adoption</i>                             | euro, area, countri, currenc, state, sinc, year, unit, singl, across, ecb, introduct, nation, banknot, growth, econom, whole, signific, first, million, changeov, compar, coin, januari, success, averag, diverg, emu, cash, now           |
|                              | Single Currency Adoption           | <i>Exchange rate convergence</i>                 | countri, exchang, rate, econom, member, currenc, converg, access, malta, adopt, •, review, join, state, economi, particip, process, challeng, finland, year, import, howev, criteria, success, time, region, bis, membership, emu, alreadi |
|                              | Institutional Framework            | <i>European integration institution-building</i> | european, union, europ, econom, nation, state, singl, member, polit, integr, common, institut, treati, rule, need, level, toward, achiev, establish, step, currenc, emu, creat, make, complet, today, mechan, commiss, respons, success    |
| Professional Culture         | Global Economy                     | <i>Global economy</i>                            | economi, intern, global, countri, world, trade, emerg, exchang, import, account, develop, market, foreign, econom, imf, capit, current, larg, globalis, flow, imbal, domest, increas, export, good, role, share, invest, major, dollar     |
|                              | Academic Debates                   | <i>Macroeconomic Research</i>                    | econom, differ, polici, shock, see, effect, research, chang, paper, suggest, impact, exampl, evid, output, work, studi, less, point, howev, recent, case, becom, bis, potenti, show, structur, cycl, channel, time, discuss                |
|                              | Academic Debates                   | <i>Decision making procedures</i>                | govern, ecb, council, decis, meet, member, taken, decid, regard, report, view, last, european, first, issu, time, take, review, present, bis, particular, nation, month, eurosystem, parliament, call, press, respect, commiss, consid     |
|                              | Academic Debates                   | <i>Statistics</i>                                | inform, develop, data, use, strategi, analysi, statist, indic, communic, forecast, model, assess,                                                                                                                                          |

|                       |          |                     |                                                                                                                                                                                                                                         |
|-----------------------|----------|---------------------|-----------------------------------------------------------------------------------------------------------------------------------------------------------------------------------------------------------------------------------------|
|                       |          |                     | import, futur, econom, time, public, uncertainti, account, provid, refer, valu, transpar, base, role, decis, aggreg, avail, project, take                                                                                               |
| Language <sup>1</sup> | Language | <i>Language - 1</i> | year, gdp, cent, increas, point, billion, itali, last, first, averag, ratio, total, compar, tax, percentag, end, estim, italian, declin, amount, current, half, public, figur, almost, account, project, debt, measu                    |
|                       | Language | <i>Language - 2</i> | say, much, question, think, time, said, know, now, germani, need, take, mean, peopl, thing, well, see, certain, cours, mani, whether, make, want, clear, german, reason, answer, good, better, right, look                              |
|                       | Language | <i>Language - 3</i> | bis, review, first, howev, chang, current, time, import, challeng, take, process, second, particular, effect, clear, make, develop, two, part, year, ratxtrtext, well, becom, major, increas, therefor, now, futur, point, main         |
|                       | Language | <i>Language - 4</i> | central, today, proof, confer, bank, thank, ladi, gentlemen, discuss, great, franc, first, year, welcom, banker, bundesbank, presid, particular, remark, topic, now, two, governor, speech, opportun, french, pleasur, invit, issu, bis |
|                       | Language | <i>Language - 5</i> | proof, attent, die, der, und, des, les, ich, commiss, dialogu, situat, par, sur, ist, que, dan, , ein, monétair, plus, swift, auf, den, une, madam, place, pour, économiqu                                                              |
|                       | Language | <i>Language - 6</i> | year, gdp, cent, increas, point, billion, €, itali, last, first, averag, ratio, total, compar, tax, percentag, end, estim, italian, declin, amount, current, half, public, figur, almost, account, project, debt, measur                |

\* The most representative words indicate the words that mostly associate a segment of text to a specific topic.

---

<sup>1</sup> The extrapolation of the topics in this domain, which includes topics that pertain to rhetorical expressions, is further confirmation of the goodness of fit of the model because it indicates that the model appropriately distinguishes substantive from non-substantive issues. If this were not the case, the non-substantive topics would have appeared in other substantive topics, thus biasing the salience and interpretation of each of them. Given the lack of substantive meaning, however, the 'language' topics have not been included in the empirical analysis.

**Figure 2**  
Topics' salience over time

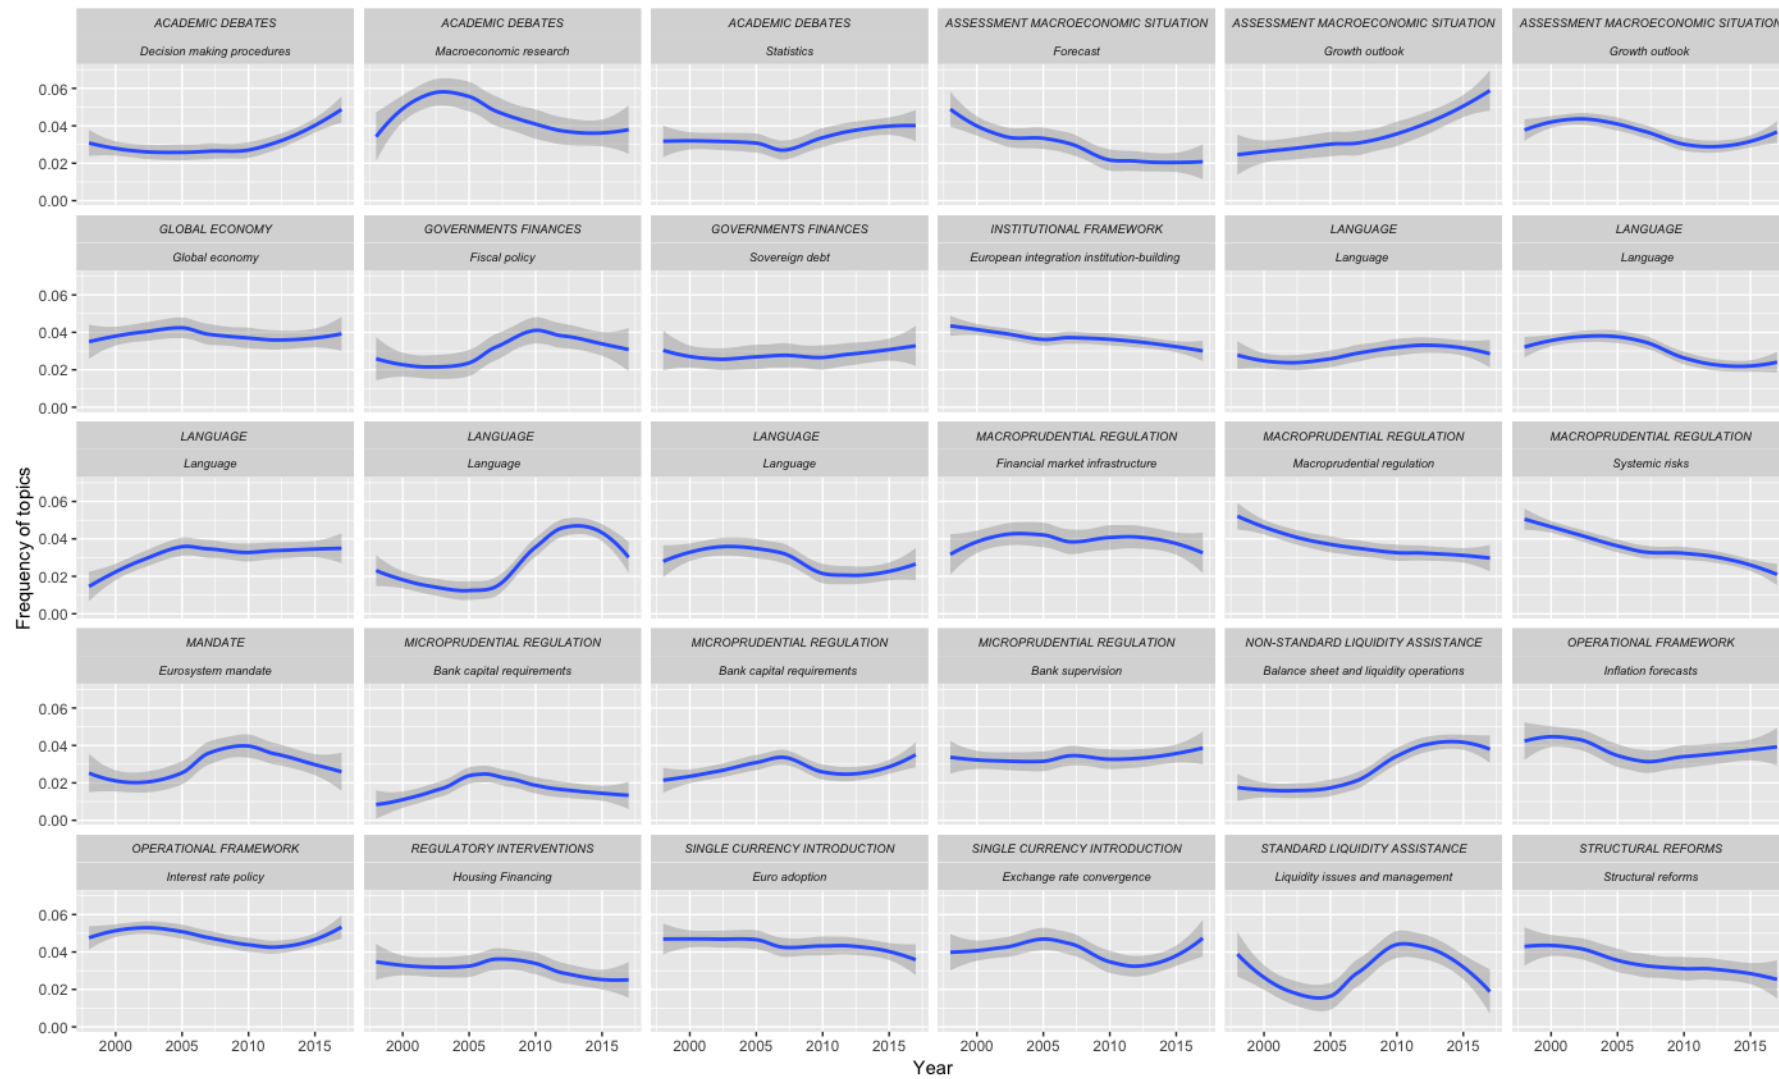

**Table 2**  
**Cosine similarity between topics in different extractions**

| Domains                           | 10 topics                       | Cosine simil. | 15 topics                       | Cosine simil. | 20 topics                              | Cosine simil. | 25 topics                              | Cosine simil. | 30 topics                              |
|-----------------------------------|---------------------------------|---------------|---------------------------------|---------------|----------------------------------------|---------------|----------------------------------------|---------------|----------------------------------------|
| Monetary Policy                   |                                 |               |                                 |               |                                        |               | Inflation forecasts                    | 0.33          | Inflation forecasts                    |
|                                   |                                 |               |                                 |               |                                        |               |                                        |               | Interest rate policy                   |
|                                   |                                 |               |                                 |               |                                        |               | Eurosystem mandate                     | 0.53          | Eurosystem mandate                     |
| Liquidity Assistance              |                                 |               |                                 |               | Balance sheet and liquidity operations | 0.77          | Balance sheet and liquidity operations | 0.73          | Balance sheet and liquidity operations |
|                                   |                                 |               |                                 |               |                                        |               |                                        |               | Liquidity issues and management        |
|                                   |                                 |               |                                 |               |                                        |               | Bank capital requirements              | 0.70          | Bank capital requirements              |
| Financial Market Regulation       | Bank capital requirements       | 0.9           | Bank capital requirements       | 0.67          | Bank capital requirements              | 0.83          | Bank capital requirements              | 0.80          | Bank capital requirements              |
|                                   |                                 |               |                                 |               |                                        |               |                                        |               | Bank supervision                       |
|                                   | Macroprudential regulation      | 0.63          | Macroprudential regulation      | 0.67          | Macroprudential regulation             | 0.77          | Macroprudential regulation             | 0.67          | Macroprudential regulation             |
|                                   |                                 |               | Systemic risks                  | 0.63          | Systemic risks                         | 0.87          | Systemic risks                         | 0.87          | Systemic risks                         |
|                                   | Financial market infrastructure | 0.87          | Financial market infrastructure | 0.9           | Financial market infrastructure        | 0.90          | Financial market infrastructure        | 0.60          | Financial market infrastructure        |
| Member Countries' Economic Policy |                                 |               |                                 |               | Structural reforms                     | 0.87          | Structural reforms                     | 0.80          | Structural reforms                     |
|                                   | Fiscal policy                   | 0.7           | Fiscal policy                   | 0.83          | Fiscal policy                          | 0.87          | Fiscal policy                          | 0.80          | Fiscal policy                          |



|                              |                        |      |                           |              |                                           |              |                                           |              |                                           |
|------------------------------|------------------------|------|---------------------------|--------------|-------------------------------------------|--------------|-------------------------------------------|--------------|-------------------------------------------|
|                              |                        |      |                           |              |                                           |              |                                           |              | Sovereign debt                            |
|                              |                        |      | Growth outlook            | 0.85         | Growth outlook                            | 0.83         | Growth outlook                            | 0.90         | Growth outlook                            |
|                              |                        |      |                           |              | Forecast                                  | 0.60         | Forecast                                  | 0.60         | Forecast                                  |
|                              |                        |      |                           |              |                                           |              |                                           |              | Housing finances                          |
| European Integration Process | Euro adoption          | 0.8  | Euro adoption             | 0.73         | Euro adoption                             | 0.90         | Euro adoption                             | 0.83         | Euro adoption                             |
|                              |                        |      |                           |              | European integration institution-building | 0.7          | European integration institution-building | 0.87         | European integration institution-building |
|                              |                        |      | Exchange rate convergence | 0.47         | Exchange rate convergence                 | 0.63         | Exchange rate convergence                 | 0.87         | Exchange rate convergence                 |
| Professional Culture         |                        |      |                           |              |                                           |              | Global economy                            | 0.63         | Global economy                            |
|                              | Macroeconomic Research | 0.83 | Macroeconomic Research    | 0.70         | Macroeconomic Research                    | 0.83         | Macroeconomic Research                    | 0.27         | Macroeconomic Research                    |
|                              |                        |      |                           |              |                                           |              | Decision making procedures                | 0.73         | Decision making procedures                |
|                              | Statistics             |      |                           |              |                                           |              |                                           |              |                                           |
| Language                     |                        |      |                           |              | Language - 1                              | 0.77         | Language - 1                              | 0.7          | Language - 1                              |
|                              |                        |      |                           | Language - 2 | 0.6                                       | Language - 2 | 0.87                                      | Language - 2 | 0.87                                      |
|                              | Language - 3           | 0.83 | Language - 3              | 0.87         | Language - 3                              | 0.8          | Language - 3                              | 0.9          | Language - 3                              |
|                              | Language - 3           | 0.63 | Language - 4              | 0.7          | Language - 4                              | 0.8          | Language - 4                              | 0.67         | Language - 4                              |
|                              |                        |      |                           |              |                                           |              | Language - 5                              | 0.7          | Language - 5                              |
|                              | Language - 6           |      |                           |              |                                           |              |                                           |              |                                           |

## Annex 2

### Binning and kernel estimators for the conditional effect of left-right positioning across values of governments' support for the EU

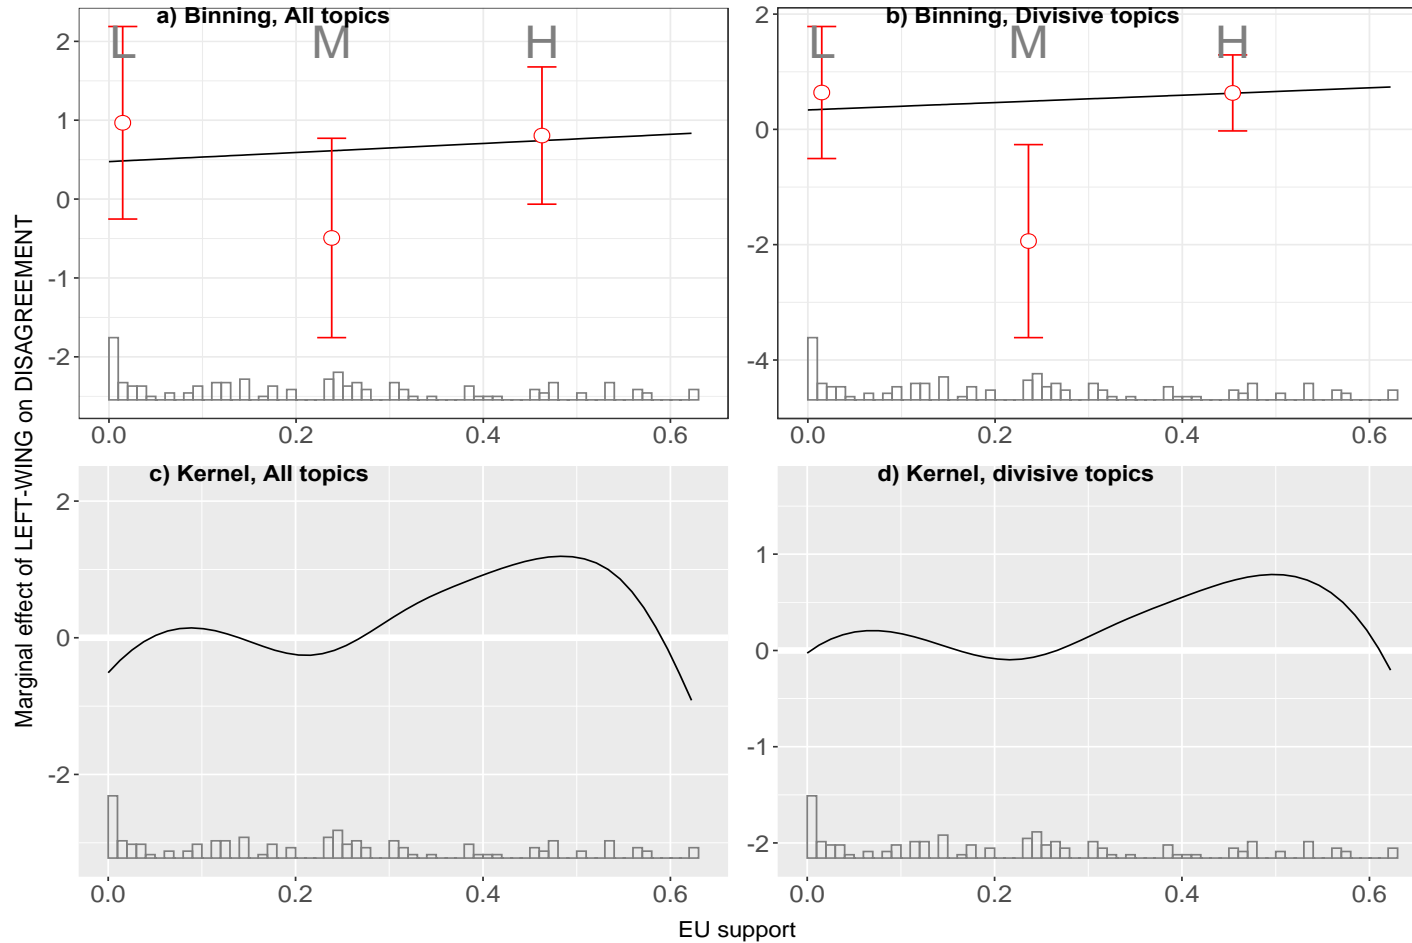

*Note:* Plots a) and b) show the estimated marginal effects using both the conventional linear interaction model (black line) and the binning estimator (red dots) for all topics (models 1 and 2) and divisive topics (models 3 and 4) respectively. Plots b) and c) show the estimated marginal effects using the kernel estimator in order to take into account nonlinear interaction effects. For more details on the binning and kernel estimators see Hainmueller et al (2019). The histograms at the bottom of the figures display the distribution of EU support.
